# Supplementary material
Source: Springer Nature journal article supplement (https://www.springermedizin.de/resource/supplementary/12879_2005_355_MOESM1_ESM.pdf/9448846)

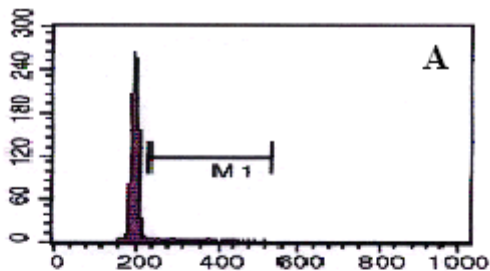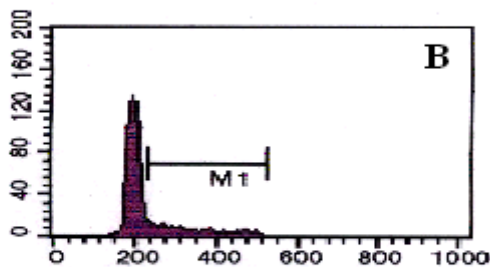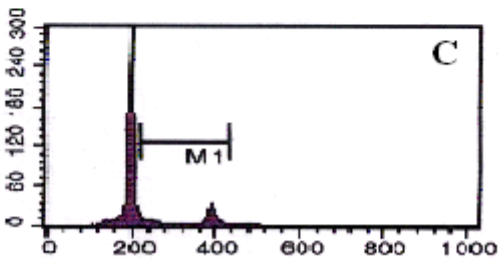

**Flourescence Intensity**

Supplement: MOESM1 [file 9448846]
